# Supplementary material for: Structural evolution and electronic properties of anionic carbon–nitrogen clusters
Source: Royal Society of Chemistry journal article supplement (doi:10.1039/d4cp03011g), 2024-01-01
Supplement: d4cp03011g1.pdf [file d4cp03011g1.pdf]

## Supporting Information

# Structural evolution and electronic properties of anionic carbon nitrogen clusters

Yuanzhi Gao,<sup>a</sup> Shu Huang,<sup>a</sup> Peixin Fu,<sup>b</sup> Chen Chen,<sup>a</sup> Kewei Ding,<sup>\*cd</sup>

and Cheng Lu,<sup>\*a</sup>

<sup>a</sup> School of Mathematics and Physics, China University of Geosciences (Wuhan),  
Wuhan 430074, China

<sup>b</sup> Department of Physics and Optoelectronic Engineering, Yangtze University, Jingzhou  
434023, China

<sup>c</sup> Xi'an Modern Chemistry Research Institute, Xi'an 710065, China

<sup>d</sup> State Key Laboratory of Fluorine and Nitrogen Chemicals, Xi'an 710065, China

\*Corresponding Authors:

E-mail: dkw204@163.com (K. W. Ding) and lucheng@calypso.cn (C. Lu)

**Table S1.** The bond lengths  $R_e$  (in Å) for N-N in  $N_2$  and C-N in HCN and the dissociation energies  $D_e$  (in eV) for  $N_2$  and CN were calculated at the M06-2X/6-311+G(d) level and compared with experimental values.

|       | $N_2$ |                    | HC-N  |                    | CN    |                        |
|-------|-------|--------------------|-------|--------------------|-------|------------------------|
|       | Theo. | Exp.               | Theo. | Exp.               | Theo. | Exp.                   |
| $R_e$ | 1.090 | 1.097 <sup>a</sup> | 1.144 | 1.157 <sup>b</sup> |       |                        |
| $D_e$ | 9.602 | 9.756 <sup>c</sup> |       |                    | 7.524 | 7.66±0.05 <sup>d</sup> |

<sup>a</sup>See Ref.1. <sup>b</sup>See Ref.2. <sup>c</sup>See Ref.3. <sup>d</sup>See Ref.4.

**Table S2.** The electron affinity potential energies EA (in eV) of C,  $N_3$ , and CN were calculated at the M06-2X/6-311+G(d) level and compared with experimental values.

|    | C      |                    | $N_3$  |                        | CN     |                    |
|----|--------|--------------------|--------|------------------------|--------|--------------------|
|    | theory | exptl              | theory | exptl                  | theory | exptl              |
| EA | 1.248  | 1.262 <sup>e</sup> | 2.749  | 2.7 ± 0.1 <sup>e</sup> | 4.080  | 3.862 <sup>e</sup> |

<sup>e</sup>See Ref.5.

**Table S3.** The calculated total energies and lowest frequencies of all ground states and metastable isomers of optimized  $\text{CN}_n^-$  clusters ( $n=4-16$ ).

| $n$ | Ground state<br>( $na$ )/eV | Frequency<br>( $na$ )/ $\text{cm}^{-1}$ | Isomer<br>( $nb$ )/eV | Frequency<br>( $nb$ )/ $\text{cm}^{-1}$ | Isomer<br>( $nc$ )/eV | Frequency<br>( $nc$ )/ $\text{cm}^{-1}$ |
|-----|-----------------------------|-----------------------------------------|-----------------------|-----------------------------------------|-----------------------|-----------------------------------------|
| 4   | -6993.284                   | 177.40                                  | -6992.219             | 63.18                                   | -6991.982             | 94.30                                   |
| 5   | -8482.639                   | 85.35                                   | -8481.699             | 283.38                                  | -8481.625             | 166.86                                  |
| 6   | -9974.864                   | 119.30                                  | -9971.240             | 99.15                                   | -9969.954             | 92.63                                   |
| 7   | -11461.691                  | 50.04                                   | -11461.130            | 111.02                                  | -11459.832            | 92.47                                   |
| 8   | -12950.872                  | 51.91                                   | -12949.806            | 48.37                                   | -12948.751            | 86.31                                   |
| 9   | -14440.029                  | 122.48                                  | -14438.855            | 62.12                                   | -14437.665            | 96.08                                   |
| 10  | -15930.689                  | 35.49                                   | -15930.217            | 37.33                                   | -15926.453            | 26.95                                   |
| 11  | -17418.337                  | -76.00                                  | -17416.124            | 40.80                                   | -17412.455            | 117.83                                  |
| 12  | -18908.925                  | 39.57                                   | -18907.784            | 24.09                                   | -18903.297            | 49.59                                   |
| 13  | -20394.279                  | 22.44                                   | -20393.196            | 67.91                                   | -20393.091            | 44.99                                   |
| 14  | -21884.246                  | 80.83                                   | -21882.142            | 21.44                                   | -21880.058            | 54.14                                   |
| 15  | -23370.076                  | 50.91                                   | -23368.677            | 27.19                                   | -23367.789            | 40.00                                   |
| 16  | -24860.863                  | 19.57                                   | -24859.940            | 63.10                                   | -24858.015            | 43.06                                   |

**Table S4.** The calculated the detachment energy of a single N atom ( $\Delta_N E$ ) and a single N<sub>2</sub> molecule ( $\Delta E_{N_2}$ ) for the ground state structures of anionic CN<sub>n</sub><sup>-</sup> ( $n = 4-16$ ) clusters as a function of N atoms.

| $n$ | $\Delta_N E$ (eV) | $\Delta E_{N_2}$ (eV) |
|-----|-------------------|-----------------------|
| 4   |                   |                       |
| 5   | 3.888             |                       |
| 6   | 6.758             | 1.045                 |
| 7   | 1.361             | -1.482                |
| 8   | 3.715             | -4.526                |
| 9   | 3.691             | -2.197                |
| 10  | 5.194             | -0.717                |
| 11  | 2.181             | -2.227                |
| 12  | 5.123             | -2.298                |
| 13  | -0.113            | -4.592                |
| 14  | 4.501             | -5.214                |
| 15  | 0.364             | -4.737                |
| 16  | 5.321             | -3.916                |

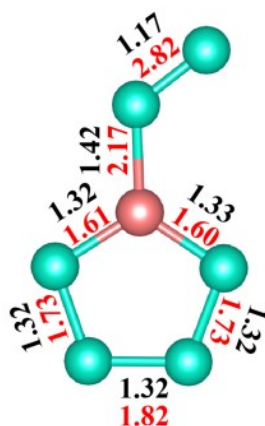

**Fig. S1** Calculated bond lengths (R, Å) and different bond orders (WBIs) {MBO} [WBI on the basis of orthogonalization] of  $CN_6^-$  clusters at the M06-2X/6-311+G(d) level, shown in black and red, respectively.

Formula for the detachment energy of a single N atom:

$$\Delta E_N(CN_n^-) = E(CN_{n-1}^-) + E(N) - E(CN_n^-)$$

where  $E$  is the total energy of the clusters or atoms shown in parentheses.

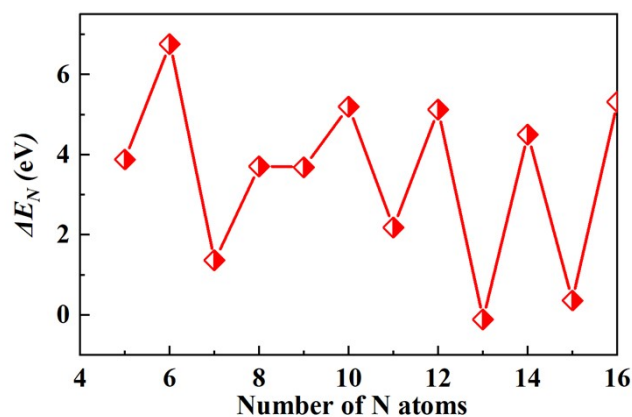

**Fig. S2** Detachment energy of a single N atom for the ground state structures of anionic  $CN_n^-$  ( $n = 4-16$ ) clusters as a function of N atoms.

Formula for the detachment energy of a single N<sub>2</sub> molecule:

$$\Delta E_{N_2}(CN_n^-) = E(CN_{n-2}^-) + E(N_2) - E(CN_n^-)$$

where  $E$  is the total energy of the clusters or atoms shown in parentheses.

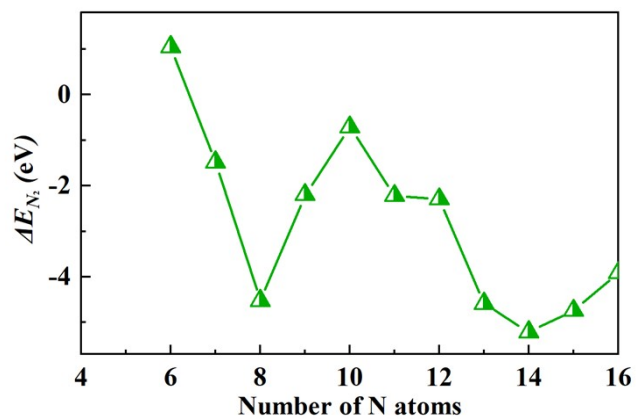

**Fig. S3** Detachment energy of a single N<sub>2</sub> molecule for the ground state structures of anionic  $CN_n^-$  ( $n = 4-16$ ) clusters as a function of N atoms.

## REFERENCES

- 1 W. M. Haynes, *CRC handbook of chemistry and physics*, CRC press, 2014.
- 2 J. W. Simmons, W. E. Anderson and W. Gordy, *Physical Review*, 1950, 77, 77.
- 3 P. Wang, S. Gong, Y. Li and Y. Mo, *The Journal of Chemical Physics*, 2024, 160, 014304.
- 4 R. Engleman Jr and P. Rouse, *Journal of Quantitative Spectroscopy and Radiative Transfer*, 1975, 15, 831- 838.
- 5 J. C. Rienstra-Kiracofe, G. S. Tschumper, H. F. Schaefer, S. Nandi and G. B. Ellison, *Chemical reviews*, 2002, 102, 231-282.
